# Supplementary material for: Understanding the dispensary workflow at the Birmingham Free Clinic: a proposed framework for an informatics intervention
Source: Springer Nature journal article supplement (doi:10.1186/s12913-016-1308-7), 2016-02-18
Supplement: MOESM1 [file 9758196]

**2X Carbon Copies:** One copy issued to patient on medication bottle, one copy saved in clinic for dispensation records, third copy is unused.

**Directions:** This field is used to describe how and when to administer the medication.

**Manufacturer:** This field is relevant if the patient is receiving a PAP prescription.

Date: \_\_\_\_\_ Rx #: \_\_\_\_\_

Patient's Name: \_\_\_\_\_

Physician: \_\_\_\_\_

Directions: \_\_\_\_\_

Medication: \_\_\_\_\_

Manufacturer: \_\_\_\_\_

Lot #: \_\_\_\_\_ Clinic: \_\_\_\_\_

**Rx#:** Prescription identifier number continually increments across all clinic sessions.

**Medication:** The name and strength of the medication is listed here.

**Clinic:** Pharmacists write 'Birmingham Free Clinic' on every label.

**Lot #:** This value indicates the specific bottle from which the dispensed medication came from.
