# Supplementary material for: Understanding the dispensary workflow at the Birmingham Free Clinic: a proposed framework for an informatics intervention
Source: Springer Nature journal article supplement (doi:10.1186/s12913-016-1308-7), 2016-02-18
Supplement: MOESM2 [file 9758196]

# Pharmacy Activity Sheet

**Source of Today's Meds:**

This field is used to indicate the specific stock the dispensed medication came from; it is used for inventory purposes.

Date \_\_\_\_\_  
Clinic \_\_\_\_\_

Pharmacist \_\_\_\_\_  
Student \_\_\_\_\_

Please fill out all columns for each patient with only one medication per line.

| Patient Name | Med & #Dispensed         | Sig.  |    | Source of Today's Meds |        |       |      | PMAP MED ORDERS |          |             |                      | Comments:<br>(App started/Pending App/Name of Pt Med Borrowed From, Income doc status, etc.) |
|--------------|--------------------------|-------|----|------------------------|--------|-------|------|-----------------|----------|-------------|----------------------|----------------------------------------------------------------------------------------------|
|              |                          |       |    | Borrowed               | Sample | Stock | PMAP | New Med         | Re-Order | Dose Change | New App or Re-Enroll |                                                                                              |
| Ex: Jane Doe | <u>Protonix</u> 40mg #30 | T BID | AT |                        |        | ✓     |      | ✓               |          |             | N / RE               | Pfizer application started for patient, will fax income docs                                 |
|              |                          |       |    |                        |        |       |      |                 |          |             | N / RE               |                                                                                              |
|              |                          |       |    |                        |        |       |      |                 |          |             | N / RE               |                                                                                              |
|              |                          |       |    |                        |        |       |      |                 |          |             | N / RE               |                                                                                              |
|              |                          |       |    |                        |        |       |      |                 |          |             | N / RE               |                                                                                              |
|              |                          |       |    |                        |        |       |      |                 |          |             | N / RE               |                                                                                              |
|              |                          |       |    |                        |        |       |      |                 |          |             | N / RE               |                                                                                              |
|              |                          |       |    |                        |        |       |      |                 |          |             | N / RE               |                                                                                              |
|              |                          |       |    |                        |        |       |      |                 |          |             | N / RE               |                                                                                              |

**PMAP Med Orders:**

Pharmacists specify if a PAP medication needs to be re-ordered in this field. Also, pharmacists use these boxes to request a dose change.

**Stock meds to be replenished:**

1. \_\_\_\_\_ 4. \_\_\_\_\_
2. \_\_\_\_\_ 5. \_\_\_\_\_
3. \_\_\_\_\_ 6. \_\_\_\_\_

**Stock meds.:** This section of the document is to report low inventory for 'General' medications.

**Comments:** This box is used to communicate the status of a PAP application to the offices at UPMC Montefiore.

**NOTES:**
